# Supplementary material for: A comprehensive study of the multiple effects of Y/Al substitution on O3-type NaNi0.33Mn0.33Fe0.33O2 with improved cycling stability and rate capability for Na-ion battery applications
Source: Royal Society of Chemistry journal article supplement (doi:10.1039/d0nr04262e), 2020-01-01
Supplement: d0nr04262e1.pdf [file d0nr04262e1.pdf]

**A Comprehensive Study of the Multiple Effects of Y/Al  
Substitution on O3-Type  $\text{NaNi}_{0.33}\text{Mn}_{0.33}\text{Fe}_{0.33}\text{O}_2$  with Improved  
Cycling Stability and Rate Capability for Na-ion Battery  
Applications**

*Na Li<sup>a</sup>, Kang Wu<sup>a</sup>, Yu Lin Lee<sup>b</sup>, Rongbin Dang<sup>a</sup>, Xin Deng<sup>a</sup>, Zhongbo Hu<sup>a</sup>, Xiaoling*

*Xiao<sup>\*a</sup>*

<sup>a</sup> College of Materials Science and Opto-electronic Technology, Center of Materials Science and Optoelectronics Engineering, University of Chinese Academy of Sciences, Beijing 100049, P. R. China.

<sup>b</sup> Department of Materials, Imperial College London, Royal School of Mines, Exhibition Road, London SW7 2AZ, UK.

**\* Corresponding Author:** E-mail: [xlxiao@ucas.ac.cn](mailto:xlxiao@ucas.ac.cn), Tel. +86 10 8825 6655.

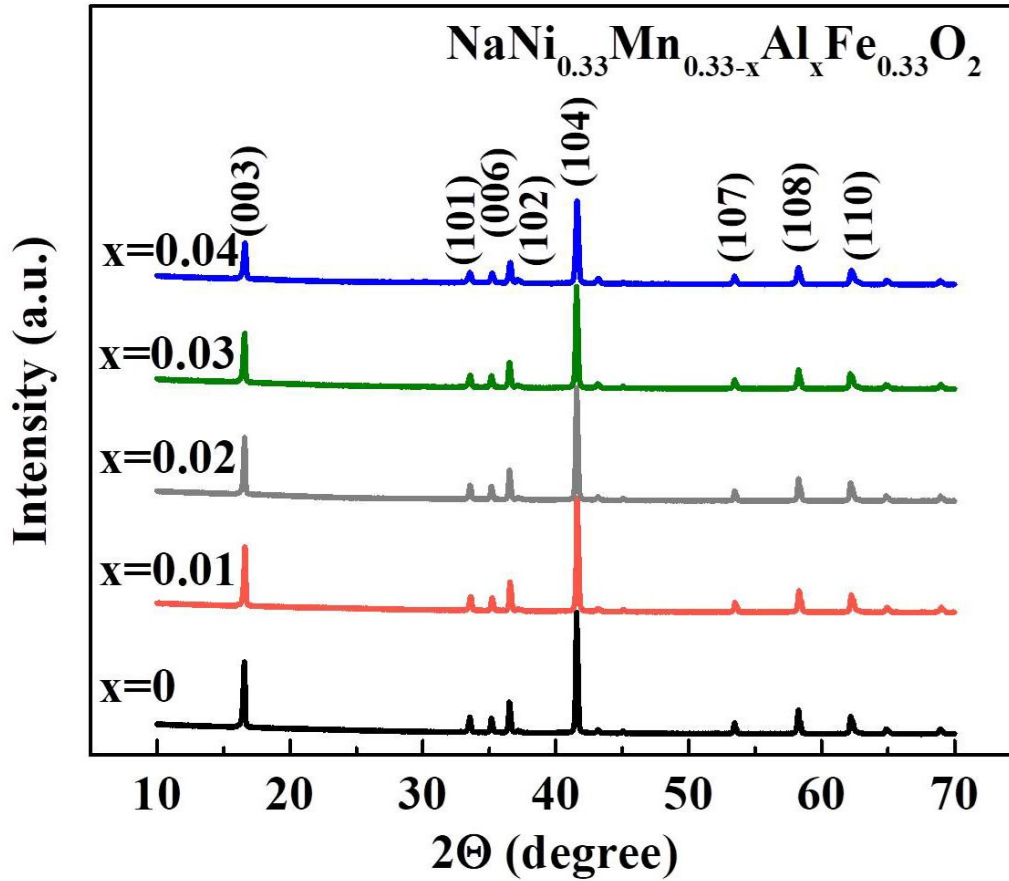

Figure S1. The X-ray diffraction patterns for Al-doped samples.

Table S1 Refined crystallographic lattice parameters of the  $\text{NaNi}_{0.33}\text{Mn}_{0.33-x}\text{Fe}_{0.33}\text{Y}_x\text{O}_2$  samples.

| Sample              | pristine    | Y0.01-doped | Y0.02-doped | Y0.03-doped | Y0.04-doped |
|---------------------|-------------|-------------|-------------|-------------|-------------|
| Space group         | $R\bar{3}m$ | $R\bar{3}m$ | $R\bar{3}m$ | $R\bar{3}m$ | $R\bar{3}m$ |
| a (Å)               | 2.9791      | 2.9796      | 2.9810      | 2.9809      | 2.9806      |
| c (Å)               | 16.0090     | 16.0129     | 16.0332     | 16.0326     | 16.0148     |
| V (Å <sup>3</sup> ) | 123.05      | 123.12      | 123.39      | 123.38      | 123.22      |
| d-spacing (Å)       | 3.219       | 3.220       | 3.236       | 3.225       | 3.223       |
| TMO2 (Å)            | 2.117       | 2.117       | 2.108       | 2.120       | 2.119       |
| $R_{wp}$ (%)        | 5.97        | 4.27        | 5.47        | 4.72        | 4.25        |
| $R_p$ (%)           | 3.75        | 2.68        | 3.24        | 2.75        | 2.70        |

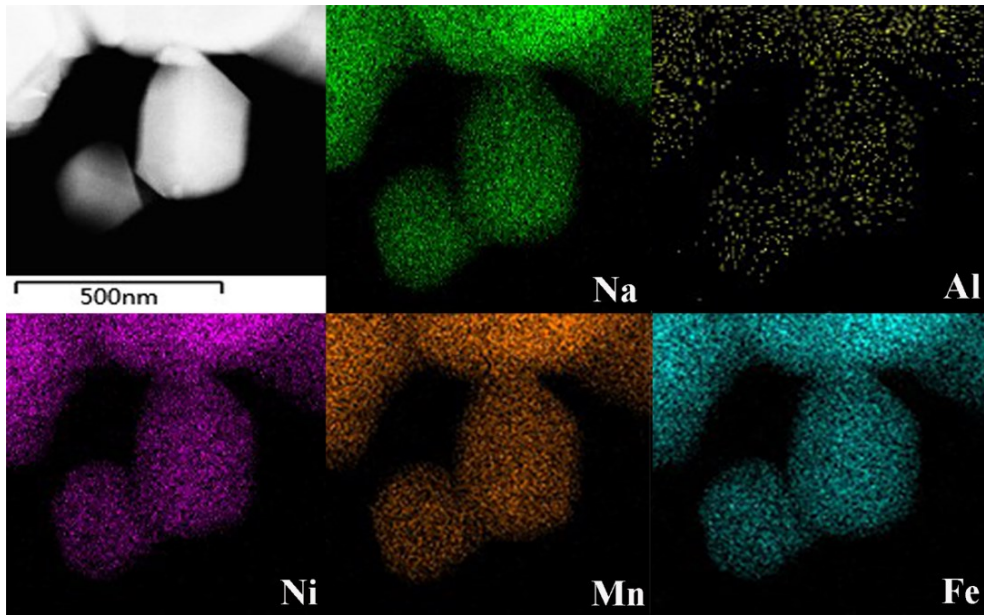

Figure S2. Elemental mapping images of the Al<sub>0.04</sub>-doped sample.

Table S2 The simulation results of EIS before cycling.

| Samples                                                                       | $R_s$             |        | $R_{ct}$          |        |
|-------------------------------------------------------------------------------|-------------------|--------|-------------------|--------|
|                                                                               | Value( $\Omega$ ) | Error% | Value( $\Omega$ ) | Error% |
| $\text{NaNi}_{0.33}\text{Mn}_{0.33}\text{Fe}_{0.33}\text{O}_2$                | 20.61             | 2.52   | 653.33            | 2.02   |
| $\text{NaNi}_{0.33}\text{Mn}_{0.31}\text{Y}_{0.02}\text{Fe}_{0.33}\text{O}_2$ | 13.96             | 2.31   | 300.63            | 1.79   |

Table S3 The simulation results of EIS after cycling.

| Samples                                                                       | $R_s$             |        | $R_{ct}$          |        |
|-------------------------------------------------------------------------------|-------------------|--------|-------------------|--------|
|                                                                               | Value( $\Omega$ ) | Error% | Value( $\Omega$ ) | Error% |
| $\text{NaNi}_{0.33}\text{Mn}_{0.33}\text{Fe}_{0.33}\text{O}_2$                | 21.67             | 4.43   | 975.07            | 1.92   |
| $\text{NaNi}_{0.33}\text{Mn}_{0.31}\text{Y}_{0.02}\text{Fe}_{0.33}\text{O}_2$ | 14.38             | 3.05   | 342.89            | 1.43   |

Table S4 The contents of lattice oxygen and surface oxygen in the cathode materials.

| Samples        | pristine | Y0.02-doped |
|----------------|----------|-------------|
| Surface oxygen | 68.96%   | 62.26%      |
| Lattice oxygen | 31.04%   | 37.74%      |
